# Supplementary material
Source: publisher figshare collection journal article supplement (https://acs.figshare.com/ndownloader/files/5685747)

Forestry practices increase mercury and methyl mercury output from boreal forest catchments

Petri Porvari, Matti Verta, John Munthe and Merja Haapanen

Environmental Science & Technology

Table 1. Concentrations of TotHg and MeHg in bulk deposition in the treatment catchment and concentrations of TotHg and MeHg in the soil of the catchment and southern Finland.

| Site                   | Concentration<br>in bulk<br>deposition<br>1995-1999 |                         | Concentration in soil          |                           |
|------------------------|-----------------------------------------------------|-------------------------|--------------------------------|---------------------------|
|                        |                                                     |                         | Humus                          | B-horizon                 |
|                        | TotHg ng l <sup>-1</sup>                            | MeHg ng l <sup>-1</sup> | ng g <sup>-1</sup> (d.w.)      | ng g <sup>-1</sup> (d.w.) |
| Treatment<br>catchment | 9.6-14                                              | 0.14-0.31               | 330 (N=5) <sup>a</sup>         | 1.46 (N=5) <sup>a</sup>   |
| Southern<br>Finland    | -                                                   | -                       | 350 ± 0.05 (N=26) <sup>a</sup> | -                         |

<sup>a</sup>Unpublished data

Table 2. Summary of statistically significant differences<sup>a</sup> in discharge, concentrations and output loads of TOC, TotHg and MeHg between the period before/after treatments, years, seasons in different years and months in different years.<sup>b</sup>

| Comparison              | Discharge | Concentration                            |                                          |                                                        | Load                                                       |                                                                           |                                                                         |
|-------------------------|-----------|------------------------------------------|------------------------------------------|--------------------------------------------------------|------------------------------------------------------------|---------------------------------------------------------------------------|-------------------------------------------------------------------------|
|                         |           | TOC                                      | TotHg                                    | MeHg                                                   | TOC                                                        | TotHg                                                                     | MeHg                                                                    |
| Before/after treatments | -         | -                                        | ***                                      | **                                                     | n.s.                                                       | -                                                                         | -                                                                       |
| Annual                  | -         | 1. c vs.. 1. t ***<br>2. c vs.. 1. t *** | 1. c vs.. 1. t ***<br>1. c vs.. 2. t *** | 1. t vs.. 3. t **                                      | 1. c vs. 1. t ***<br>2. c vs. 1. t ***<br>3. c vs 1. t *** | 1. c vs.. 1., 2., 3. t<br>2. c vs.. 1., 2., 3. t<br>2. c vs. 1., 2., 3. t | 1. c vs. 1., 2., 3. t<br>2. c vs. 1., 2., 3. t<br>2. c vs. 1., 2., 3. t |
| Seasonal                | -         | -                                        | n.s.                                     | spring: 2. c vs.. 2. t **<br>autumn: 2. c vs.. 3. t ** | -                                                          | -                                                                         | -                                                                       |
| Monthly                 | *         | -                                        | -                                        | -                                                      | **                                                         | *                                                                         | *                                                                       |

<sup>a</sup>\*, p<0.05; \*\*, p<0.01; \*\*\*, p<0.001; n.s., not significant; -, not tested. <sup>b</sup> In annual and seasonal comparisons the years before treatments (calibration period) are abbreviated as "c" and the years after treatments are abbreviated as "t". E.g. the comparison between first calibration year and first year after treatment is written "1. c vs.. 1. t".

Figure 1. Comparison of runoffs and loads of TOC, TotHg and MeHg between the reference and treatment catchments during the calibration period 6/1994 – 8/1997.

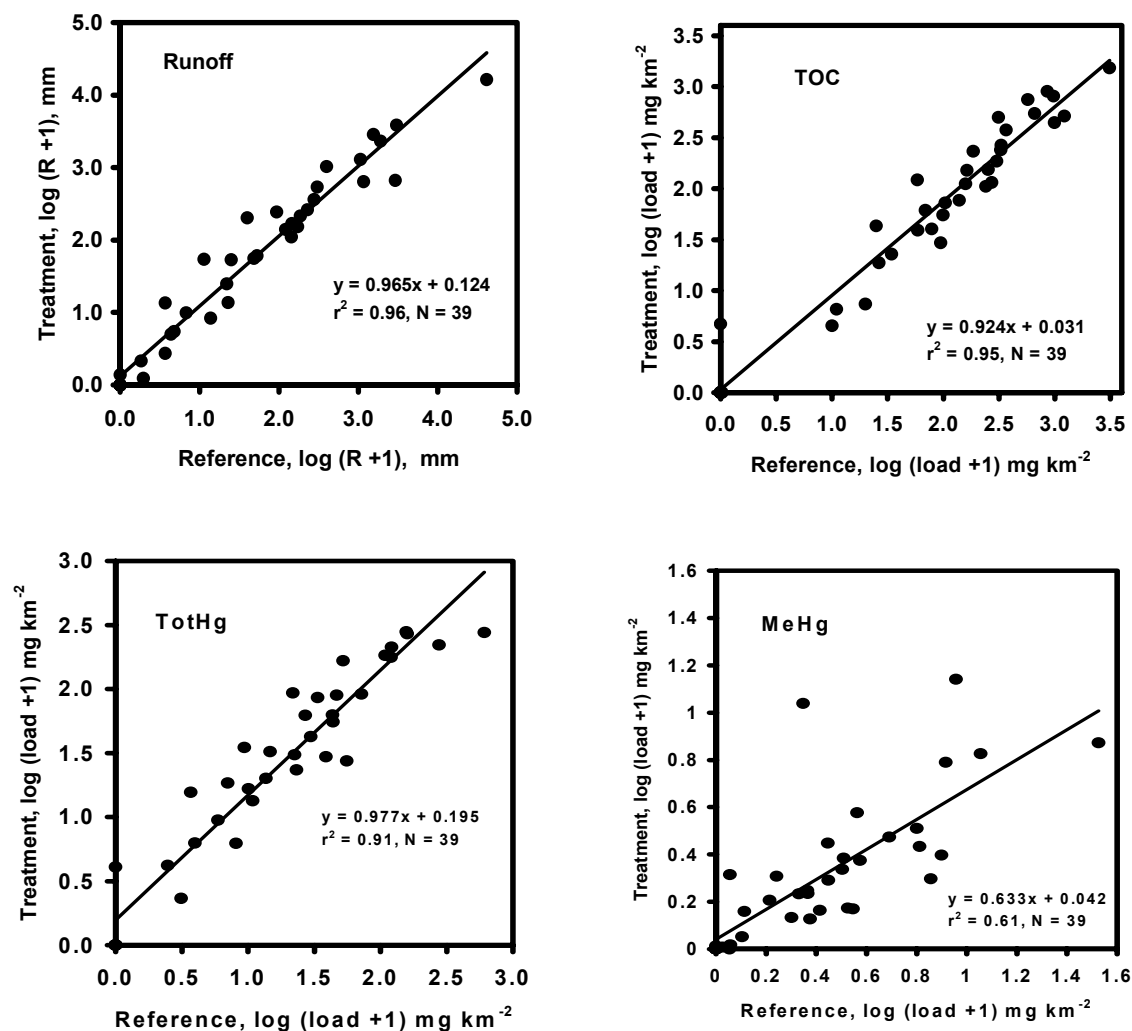

Supplement: Supplementary file 1 [file 5685747]
